1 **Autolysin-Independent DNA Release in *Streptococcus***  
2 ***pneumoniae in vitro* Biofilms**

3

4 **Mirian Domenech,<sup>a,b</sup> Ernesto García<sup>a,b#</sup>**

5

6 <sup>a</sup>Departamento de Biotecnología Microbiana y de Plantas, Centro de  
7 Investigaciones Biológicas (CSIC), Ramiro de Maeztu 9, 28040 Madrid, Spain.

8 <sup>b</sup>CIBER de Enfermedades Respiratorias (CIBERES), Madrid, Spain

9

10 Running Head: Extracellular DNA in Pneumococcal Biofilms

11

12 #Address correspondence to Ernesto García, e.garcia@cib.csic.es.

13

14 Word counts: Abstract, 232; Importance, 147; Text, 5,251.

15

16

17 **ABSTRACT** Biofilms are defined as layers of cells of microorganisms  
18 adhered to the surface of a substrate and embedded in an extracellular matrix  
19 and provide an appropriate environment for increased genetic exchange.  
20 Extracellular DNA (eDNA) is an essential component of the extracellular matrix  
21 of microbial biofilms, but the pathway(s) responsible for DNA release are largely  
22 unknown. Autolysis (either spontaneous or phage-induced) has been proposed  
23 the major event leading to the appearance of eDNA. The 'suicidal tendency' of  
24 *Streptococcus pneumoniae* is well-known, with lysis mainly caused by the  
25 triggering of LytA, the major autolytic amidase. However, the LytC lysozyme  
26 and CbpD (a possible murein hydrolase) have also been shown involved. The  
27 present work examines the relationship between eDNA, autolysins, and the  
28 formation and maintenance of *in vitro* pneumococcal biofilms, via fluorescent  
29 labelling combined with confocal laser scanning microscopy, plus genetic  
30 transformation experiments. Bacterial DNA release mechanisms other than  
31 those entailing lytic enzymes were shown to be involved by demonstrating that  
32 horizontal gene transfer in biofilms takes place even in the absence of  
33 detectable autolytic activity. It had been previously suggested that the quorum  
34 sensing systems ComABCDE and LuxS/AI-2 are involved in the production of  
35 eDNA as a response to the accumulation of quorum sensing signals, although  
36 our immunofluorescence results do not support this hypothesis. Evidence that  
37 the release of DNA is somehow linked to the production of extracellular vesicles  
38 by *S. pneumoniae* is provided.

39 **IMPORTANCE** Most human bacterial infections are caused by  
40 microorganisms growing as biofilms. Bacteria in biofilms are less susceptible to  
41 antimicrobials and to killing by the host immune system, are very difficult to  
42 eliminate and cause recalcitrant and persistent diseases. Extracellular DNA is  
43 one of the major components of the bacterial biofilm matrix. In the present  
44 study, we provide direct evidence of the existence of biologically active  
45 (transforming), extracellular DNA in *Streptococcus pneumoniae* biofilms. In

46 previous studies, the involvement of three pneumococcal choline-binding  
47 proteins with autolytic activity (LytA, LytC and CbpD) in DNA release had been  
48 reported. In contrast, we demonstrate here that pneumococcal *in vitro* biofilms  
49 do contain eDNA, even in the absence of these enzymes. Moreover, our results  
50 suggest that DNA release in *S. pneumoniae* biofilms is connected with the  
51 production of extracellular vesicles and that this DNA is associated to the outer  
52 part of the vesicles.

53

54 The human pathogen *Streptococcus pneumoniae* is a leading cause of  
55 pneumonia, meningitis and bloodstream infections in the elderly, and one of the  
56 main pathogens responsible for middle ear infections in children. It is carried  
57 asymptotically in the nasopharynx of many healthy adults, and in as many as  
58 20–40% of healthy children (colonization begins shortly after birth) (1).  
59 Pneumococcal biofilms appear on adenoid and mucosal epithelium in children  
60 with recurrent middle-ear infections and otitis media with effusion, and on the  
61 sinus mucosa of patients with chronic rhinosinusitis, and they can be also  
62 formed *in vitro* (2, 3). Biofilm formation in *S. pneumoniae* is an efficient way of  
63 evading both the classical and the PspC-dependent alternative complement  
64 pathways (4).

65 Over 60% of all human bacterial infections, and up to 80% of those that  
66 become chronic, are thought to involve growth in biofilms. A biofilm is defined  
67 as an accumulation of microorganisms embedded in a self-produced  
68 extracellular matrix (ECM) adhered to an abiotic or living surface (5). The ECM  
69 is composed of different polymers, mainly polysaccharides, proteins, and  
70 nucleic acids. The requirement of extracellular deoxyribonucleic acid (eDNA) in  
71 ECM formation and maintenance has been documented in a variety of Gram-  
72 positive and Gram-negative bacteria (6). eDNA binds to polysaccharides and/or  
73 proteins, protecting bacterial cells from physical and/or chemical challenges, as  
74 well as providing biofilms with structural integrity. It is a major component of the  
75 *S. pneumoniae* ECM (7-11). Various pneumococcal surface proteins, *e.g.*,  
76 several members of the choline-binding family of proteins (CBPs) (11, 12) and  
77 the pneumococcal serine-rich repeat protein (PsrP) (13), form tight complexes  
78 with eDNA via electrostatic interactions, a mechanism proposed widespread  
79 among microorganisms (14). It should be noted that PsrP appears in  $\approx$  60% of  
80 clinical pneumococcal isolates, whereas the main CBPs — LytA  
81 (SPD\_1737/SPD\_RS09190), LytB (SPD\_0853/SPD\_RS04550), LytC

82 (SPD\_1403/SPD\_RS07385) or CbpD (SPD\_2028/SPD\_RS10645) among  
83 others — are present in all *S. pneumoniae* strains.

84 The source of eDNA may vary across microorganisms and in part appears  
85 because of autolysis, phage-induced lysis, and/or active secretion systems, as  
86 well as through association with extracellular vesicles (EV). In *S. pneumoniae*,  
87 the release of DNA during limited lysis of the culture, *i.e.*, by controlled autolysis  
88 directed by the main CBP autolysins (LytA *N*-acetylmuramoyl- $\Gamma$ -alanine  
89 amidase [EC 3.5.1.28; NAM-amidase] and LytC lysozyme [EC 3.2.1.17;  
90 muramidase]), as well as prophage-mediated lysis, have been proposed as  
91 biofilm-promoting in part of the bacterial population (9, 11). The NAM-amidase  
92 LytA, the main autolytic enzyme of *S. pneumoniae*, is kept under control by  
93 lipoteichoic acid — a membrane-bound teichoic acid that contains choline —  
94 during exponential growth (15), and regulated at the level of substrate  
95 recognition (16). LytC also acts as an autolysin when pneumococci are  
96 incubated at about 30°C, a temperature close to that of the upper respiratory  
97 tract (17); this lysozyme might be post-transcriptionally inhibited by CbpF  
98 (SPD\_0345/SPD\_RS01835) (18).

99 Studies in different microorganisms suggest that the appearance of eDNA in  
100 biofilms may also be a response to the accumulation of quorum sensing (QS - a  
101 cell density-dependent communication system that regulates cooperative  
102 behavior) signals (for a recent review, see reference 19). Two early studies on  
103 genetic transformation in planktonic cultures showed *S. pneumoniae* to release  
104 measurable amounts of DNA in the absence of detectable autolysis (20).  
105 Although these pioneering studies were forgotten for years, more recent  
106 investigations have shown that LytA, LytC and CbpD (a putative cell wall-  
107 degrading enzyme) are directly responsible for autolytic DNA release from only  
108 a subset of cells in competent pneumococcal planktonic cultures (21, 22). In  
109 fact, the killing of non-competent sister cells by competent pneumococci — a  
110 phenomenon named fratricide — promotes allolysis and DNA release (23).

111 It is well known that competence induction in *S. pneumoniae* depends on a QS  
112 mechanism (24). LytA, LytC and CbpD are all required for autolysis (and for the  
113 concomitant DNA release) when pneumococci grow under planktonic conditions  
114 (25). It is currently believed that the limited damage caused by CbpD activates  
115 LytA and LytC, resulting in the more extensive lysis of target cells than that  
116 achieved by CbpD alone. LytA and LytC are constitutively synthesized by non-  
117 competent cells. However, while the expression of LytA increases during  
118 competence, LytC is not part of the competence regulon in *S. pneumoniae* (26).  
119 A slightly different situation has been proposed to occur in biofilms. The lysis of  
120 target (non-competent) cells in biofilms requires CbpD to act in conjunction with  
121 LytC, whereas LytA is not required for efficient fratricide-mediated gene  
122 exchange (26). In these experiments, however, a direct visualization of eDNA in  
123 the ECM was not reported. Interestingly, the transcription of both *lytA* and *cbpD*  
124 also appears to be regulated by the LusX/autoinducer-2 (AI-2) QS (27).

125 Via the use of an *in vitro* biofilm model system, the present work provides  
126 evidence that a small (but significant) proportion of biologically active, eDNA in  
127 pneumococcal biofilms is released into the medium by an alternative (or  
128 complementary) pathway to cell autolysis. It would appear that this occurs  
129 independent of the activity of LytA, LytC and CbpD and the QS systems  
130 (ComABCDE and LuxS/AI).

## 131 **RESULTS**

132 **Visualization of eDNA in the pneumococcal biofilm.** *S. pneumoniae* R6  
133 biofilms grown for 5 h at 34°C in C+Y medium were stained with a combination  
134 of SYTO 59, DDAO (7-hydroxy-9H-[1,3-dichloro-9,9-dimethylacridin-2-one]) and  
135 anti-double-stranded (ds) DNA monoclonal antibodies ( $\alpha$ -dsDNA). When  
136 examined under the confocal laser scanning microscope (CLSM), abundant,  
137 mostly cell-associated eDNA was observed (Fig. 1). However, when scanned at  
138 488 nm (green), immunostained eDNA appeared as a lattice-like array

139 consisting of long DNA fibers, mainly at the top of the biofilm (Fig. 1C). Only  
140 seldomly they were associated with the cocci (marked with yellow arrows in Fig.  
141 1I). At the bottom of the biofilm, small areas of what appeared to be compacted  
142 eDNA (but no fibers) were seen (data not shown).

143 Notably, DNA fibers were not observed when DDAO was employed. Many  
144 reports have used DDAO for staining eDNA in biofilms (28). However, a recent  
145 evaluation of eDNA stains in biofilms of various species has shown that this  
146 compound was neither completely cell impermeant nor capable to reveal DNA-  
147 containing fibrillar structures (29). As our results were in agreement with these  
148 data, DDAO was not used in additional experiments.

149 To study the dynamics of eDNA release, strain R6 was incubated under  
150 biofilm-forming conditions for up to 5 h at 34°C. Immunostaining with  $\alpha$ -dsDNA  
151 of sessile (adherent) cells revealed the existence of eDNA even at early  
152 incubation times (Fig. 2). At 3 h, eDNA filaments were visible, although the  
153 majority of eDNA appeared as dots and patches, which may represent different  
154 stages of condensation of DNA–protein aggregates, as previously suggested  
155 (12). In 5 h-old biofilms, eDNA threads were infrequent and mainly located at  
156 the top of the biofilm (see above). Previous studies have revealed the existence  
157 of a mature ECM (consisting of DNA, proteins and polysaccharides) at this time  
158 point (11). Immunostaining planktonic cultures (*i.e.*, non-adherent cells)  
159 revealed the existence of eDNA filaments that were more abundant in younger  
160 than in older cultures (Fig. 2).

161 **Evidence of the presence of eDNA in biofilms formed by different**  
162 **pneumococcal mutants.** The involvement of eDNA in biofilm formation and  
163 maintenance was ascertained using strain P046, which lacks the two main  
164 autolytic CBPs. Strain P234 was employed as a control; this has a point  
165 mutation in the *pspC* (= *cbpA*) gene (SPD\_2017/SPD\_RS10590), which  
166 encodes a CBP important in virulence (30). PspC, which lacks any autolytic  
167 activity and is partly involved in biofilm formation *in vitro* (on polystyrene

168 microtiter plates) (7) and *in vivo* (in a murine nasopharynx colonization model)  
169 (3), also forms complexes with the eDNA (12). Compared to the parental R6  
170 strain, both mutants showed reduced biofilm-forming capacity, in agreement  
171 with previous findings (7). Interestingly, biofilm formation, but not culture growth,  
172 was greatly impaired when pneumococci were grown in the presence of DNase  
173 I (Fig. 3). Moreover, the incubation of preformed biofilms with DNase I  
174 drastically diminished the number of biofilm-associated sessile cells. As a  
175 whole, however, preformed biofilms were less reduced by DNase I treatment  
176 than growing biofilms, strongly suggesting that eDNA is more important and/or  
177 more exposed during the early stages of biofilm formation. Alternatively, eDNA  
178 may become resistant to DNase enzymes during biofilm maturation by forming  
179 complexes with other macromolecules such as CBPs.

180 The presence of eDNA in the biofilms of  $\Delta comC$  (SPD\_2066/SPD\_RS10845)  
181 or  $\Delta luxS$  (SPD\_0309/SPD\_RS1650) mutants was also analyzed. These genes  
182 are essential for the functioning of two QS systems documented as being  
183 involved in biofilm formation (see above). The *comC* gene codes for the pre-  
184 CSP (competence-stimulating peptide), which is matured and exported by the  
185 ComA–ComB complex as an unmodified 17-residue-long peptide pheromone.  
186 LuxS is an S-ribosylhomocysteine lyase, and is responsible for the production of  
187 the QS molecule homoserine lactone autoinducer 2 (AI-2). It has been reported  
188 that transcription of competence genes (including *lytA* and *cbpD*) is reduced in a  
189  $\Delta luxS$  strain (27). As shown above for two CBP mutants, the  $\Delta comC$  and  $\Delta luxS$   
190 mutants produced only  $\approx 50\%$  of the biofilm formed by the R6 strain (Fig. 3).  
191 Positive evidence for the involvement of eDNA in formation and maintenance of  
192 these biofilms was also obtained by treatment with DNase I (Fig. 3).

193 **Contribution of lytic CBPs to eDNA release.** The presence of eDNA in the  
194 ECM of biofilms formed by strain P046 — a double *LytA*<sup>-</sup> *LytC*<sup>-</sup> mutant — was  
195 unexpected since it is generally believed that at least one of the autolysins is  
196 required for DNA release (see above). To gain further insight, the existence of



197 eDNA in the biofilm formed by a mutant deficient in CbpD (or its combination  
198 with the *lytA* and *lytC* mutations) was analyzed. A *pspC* mutant (strain P234)  
199 was included as a control. Notably, eDNA was present even in the ECM of  
200 strain P204, a mutant deficient in the three CBPs, *i.e.*, LytA, LytC and CbpD  
201 (Fig. 4). The morphology of the biofilms formed by strain P204 differed from  
202 those of R6, with the former biofilms containing fewer microcolonies and larger  
203 eDNA patches than the wild type.

204 It is well known that when pneumococcal cells are incubated with 2% choline  
205 chloride, CBPs are released into the medium. Those with enzymatic activity are  
206 completely inhibited (31), but transformability is not altered (32). Under these  
207 conditions, however, the biofilm-forming capacity is severely reduced (7). This  
208 was confirmed in the present work, and might be attributed (at least in part) to  
209 the drastically diminished eDNA content of the biofilm. Quite unexpectedly, R6  
210 biofilms formed in the presence of 2% choline chloride still showed the  
211 presence of eDNA (Fig. 4).

212 **The competence QS system is not involved in eDNA release.** The  
213 presence of eDNA in biofilms formed by additional *S. pneumoniae* strains  
214 possessing combinations of mutations affecting the *comA* gene and various lytic  
215 genes was studied by CLSM. These strains were R391, P203, P204, and P213.  
216 The P147 strain (*ciaH*<sub>Tupelo\_VT</sub>; SPD\_0702/SPD\_RS0372) was also included  
217 since in previous work our group has shown that CiaR/H, a two-component  
218 signal transduction system that mediates the stress response, is in some way:  
219 a) implicated in the triggering of the LytA autolysin (33), b) required for efficient  
220 *in vitro* biofilm formation and nasopharyngeal colonization in a mouse model  
221 (34), and c) involved in the control of competence for genetic transformation  
222 (35). CLSM observations of *in vitro* biofilms showed eDNA to be also present in  
223 the biofilms of every mutant tested (Fig. 5).

224 **Transforming capacity of eDNA in pneumococcal biofilms.** The above  
225 results indicate that *in vitro* pneumococcal biofilms are capable of releasing

226 eDNA in a manner apparently independent of the activity of the three  
227 pneumococcal autolysins LytA, LytC and CbpD — even though these were  
228 generally believed necessary for DNA release in planktonic cultures. To  
229 investigate whether the eDNA in the biofilms formed by pneumococci  
230 simultaneously deficient in these three lytic enzymes has transforming activity,  
231 the efficacy of gene transfer in mixed biofilms was determined. For this, the  
232 reciprocal (donor and recipient) transforming capacity of two strain pairs was  
233 measured: in addition to being autolysin proficient (or not), one pair harbored  
234 the well-known low efficiency (LE) *nov1* marker (a C:G to T:A transition  
235 mutation conferring novobiocin resistance) (36), and the other the high  
236 efficiency (HE) marker *str41* (an A:T to C:G transversion), which bestows  
237 streptomycin resistance (37). To allow for further characterization of the  
238 direction of DNA transfer, the latter pair of strains used was also resistant to  
239 optochin. In pneumococcal transformation, the LE markers return 5–10% as  
240 many transformed cells as do HE markers (which are little degraded, or not at  
241 all). Table 1 shows that, in the biofilms, the spontaneous transformation of  
242 autolysin-proficient strains (P233 and P273) took place at levels typically  
243 observed in planktonic cultures when using naked chromosomal DNA (between  
244 0.1 and 1% of total viable cells). Moreover, the heteroduplex DNA base  
245 mismatch repair system (Hex), which is responsible for marker-specific  
246 variations in transforming efficiency in planktonic cultures (38), was functional in  
247 the pneumococcal biofilms, as deduced from the relative transfer efficiency of  
248 the LE *nov1* and HE *str41* mutations (Table 1). In agreement with that reported  
249 by other authors (26), the transformation frequency was reduced by more than  
250 100-fold in mixed biofilms formed by the mutants deficient in the three lytic  
251 enzymes. On average, however, one among  $10^5$  pneumococci showed  
252 transformation to streptomycin resistance, demonstrating that a small amount of  
253 biologically active eDNA was still present in the ECM of the biofilms formed by  
254 the triple deficient mutant.

255 Previous studies performed with different bacteria have suggested that, in  
256 addition to autolytic phenomena, eDNA might be associated with EV. Recent  
257 evidence indicates that *S. pneumoniae*, actively sheds extracellular nano-sized  
258 EV, as do many other microorganisms (39-41). Whether pneumococcal EV  
259 contains DNA, however, was never examined. Here, high-speed sediments of  
260 biofilm filtrates — a crude preparation of EV with associated DNA (see Fig. S2  
261 in the supplemental material)— were used to perform additional transformation  
262 experiments. The results confirmed a measurable amount of transforming DNA  
263 to be present in these crude preparations, and that this DNA could be destroyed  
264 by treatment with DNase I (Table 2). Comparable results were obtained when  
265 strain P271 was incubated under planktonic conditions.

## 266 **DISCUSSION**

267 It has been known for decades that biofilm ECM contains eDNA, but its  
268 active role in biofilm appearance and maintenance was not recognized until  
269 Whitchurch *et al.* added DNase I to a *Pseudomonas aeruginosa* biofilm and  
270 watched the biofilm disappear (42). Since then, many reports have confirmed  
271 that a plethora of bacteria require eDNA to establish and maintain biofilms (6).  
272 The destruction of this eDNA provides a way of fighting biofilm-producing  
273 pathogens. Indeed, numerous clinical studies have shown that aerosolized  
274 DNase I (dornase alpha, a recombinant DNase I from the human pancreas) is  
275 highly effective in this respect, improving the lung function of patients with cystic  
276 fibrosis (43).

277 *In vivo* studies have shown that eDNA is a major element of biofilms.  
278 However, whether it is of bacterial or environmental (including host) origin (or  
279 both) is controversial; certainly it is difficult to determine which is the case under  
280 *in vivo* conditions. Studies using *in vitro* biofilm models (grown on plastic, glass,  
281 or other abiotic surfaces) provide a convenient way to screen large sets of  
282 strains, treatments, or growing conditions (44).

283        Among the possible origins of eDNA in pneumococcal biofilms (14),  
284        autolysins (either from bacterial or phage origin) have been proposed to have  
285        critical role. Previous studies performed at our own and other laboratories have  
286        employed indirect (e.g., DNase I treatment and/or intrabiofilm transformation  
287        experiments) and direct methods (e.g., staining with a variety of DNA-specific  
288        fluorophores) to disclose the presence of eDNA in pneumococcal biofilms (7-9,  
289        11, 26, 27). Immunostaining with  $\alpha$ -dsDNA combined with CLSM also revealed  
290        the existence of long filaments of eDNA in biofilms formed either by  
291        *Enterococcus faecalis* (45) or *Haemophilus influenzae* ECM (46). Moreover, the  
292        presence of eDNA-containing fibrous structures in the ECM of *Staphylococcus*  
293        *aureus* and *Propionibacterium acnes* biofilms has also been reported using  $\alpha$ -  
294        dsDNA and atmospheric scanning electron microscopy (47, 48). The use of  
295        different technical approaches reinforces the idea that the fibrous assemblies of  
296        eDNA observed in some bacterial biofilms actually exist and also offers a novel  
297        perspective of the ECM structure of pneumococcal biofilms. Since most of the  
298        DNA filaments were found at the top of the mature biofilm (where actively  
299        growing cells reside) within 3 h of growth (Fig. 1), it is unlikely that these eDNA  
300        fibers were formed exclusively via autolysis. The same conclusion might be  
301        drawn from the CLSM images of immunostained planktonic cultures (Fig. 2).

302        In agreement with previous results, pneumococcal mutants either lacking the  
303        major autolysins or deficient in Com or LuxS/AI2 QSs showed limited biofilm-  
304        forming capacity. However, the results obtained following DNase I treatment of  
305        growing or pre-formed biofilms strongly suggest that those biofilms still contain  
306        eDNA. Direct CLSM visualization of the corresponding immunostained biofilms  
307        fully confirmed the presence of eDNA, even when the pneumococci were  
308        incubated in the presence of 2% choline chloride; this is known to induce the  
309        complete non-competitive inhibition of CBPs with enzyme activity, and to  
310        release all CBPs, whether enzymatic or not, from their bacterial surface  
311        attachments. It should be noted, however, that even at this high concentration,

312 choline does not separate the CBP–DNA complexes that form part of the ECM  
313 of *S. pneumoniae* biofilms (11, 12). Nevertheless, since the complete inhibition  
314 of the enzymatic activity of autolysins takes place under these conditions, an  
315 exclusive, direct role for such enzymes in eDNA release appears to be unlikely.  
316 More direct evidence was obtained using biofilms formed by strain P204, a triple  
317  $\Delta lytA \Delta lytC \Delta cbpD$  mutant, in which the presence of eDNA was also verified  
318 (Fig. 4). The release of eDNA was also observed in biofilms formed by  $\Delta comA$   
319 mutants or combined  $\Delta comA$ /autolysin-deficient mutations. Most notably, the  
320 existence of biologically active eDNA in pneumococcal biofilms — even when  
321 autolysin-deficient strains were used — was fully confirmed by *in situ* reciprocal  
322 transformation experiments (Table 1). Deletion of either *lytA*, *lytC* and/or *cbpD*  
323 does not alter the transformability of the mutants compared to their parental  
324 strains when chromosomal DNA or plasmid(s) is used as donor material (17,  
325 49). Wei and Håvarstein studied the impact of LytA, LytC and CbpD on  
326 transformation efficiency in biofilm-grown pneumococci using an approach with  
327 some similarity to that employed here (26). The authors made use of *in vitro*  
328 mixed biofilms containing spectinomycin-resistant ( $Spc^r$ )  $\Delta comA$  ‘attacker cells’  
329 — harboring concomitant deletions in the three autolysin genes (strain  
330 SPH149), or not (strain RH1) — and  $Nov^r$  non-competent ( $\Delta comA \Delta comE$ )  
331 ‘target cells’ (strain RH401). Upon the addition of CSP, the attackers (but not  
332 the targets, due to their being  $\Delta comE$ ) acquired competence and were  
333 transformed by the DNA released from the target cells through the fratricidal  
334 killing caused by the lytic enzymes induced by the attackers. A *ca.* 40-fold  
335 reduction in transformation efficiency was observed in biofilms composed of  
336 SPH149 attackers (autolysin-deficient) and RH401 cells (0.009%) with respect  
337 to that seen in biofilms containing the same target cells but involving a lysis-  
338 proficient strain (RH1) as the attacker (0.34%). Moreover, a further near 40-fold  
339 reduction in gene transfer frequency (0.00026%) was seen when SPH149  
340 attackers were incubated with  $\Delta lytA \Delta lytC$  targets cells (strain SPH148) (26).

341 Target cells containing a  $\Delta cbpD$  mutation were not tested, possibly because, as  
342 previously reported for mixed planktonic cultures, CbpD-proficient attacker cells  
343 (RH1) were 1000-fold more efficient in transformations involving  $cbpD^+$  target  
344 cells than were CbpD-deficient attacker cells (49).

345 Pneumococcal biofilms that form during nasopharyngeal colonization may  
346 provide an optimal environment for increased genetic exchange with enhanced  
347 natural transformation *in vivo* (3). The presence of eDNA in the biofilm matrix  
348 has generally been attributed to the autolysis of a subpopulation of cells via  
349 fratricidal killing, suicidal killing, and/or the controlled release of DNA via signal  
350 transduction (19). Autolysis-independent eDNA release has been documented  
351 in some Gram-positive bacteria including *Bacillus subtilis* (50), enterococci (45,  
352 51), and staphylococci (52, 53). Taking the present results together, it is clear  
353 that mechanisms involved in active eDNA release (perhaps associated with the  
354 production of EV), other than those directly dependent on autolysins, are at  
355 work in *S. pneumoniae*. This is important since an important feature of biofilms  
356 is the development of chemical gradients (i.e., pH, redox potential, and ions)  
357 (reviewed in reference 28). For example, in *P. aeruginosa* biofilms the pH value  
358 towards the center of a microcolony ( $\approx 6.0$ ) is lower than that at the edge of the  
359 biofilm or in the growth medium ( $\approx 6.8$ ) (54). Although not directly tested, a  
360 similar situation might be relevant in pneumococcal biofilms because it is well  
361 known that *S. pneumoniae* autolysis is inhibited at low pH values ( $\leq 6.0$ ) (55). In  
362 this case, autolysin-independent DNA release would allow the maintenance of  
363 horizontal gene transfer events within the biofilm. Although the amount of  
364 biologically active DNA released in the absence of detectable autolytic activity is  
365 limited, it appears to be sufficient to partially promote a biofilm lifestyle and,  
366 importantly, to allow horizontal gene transfer. It is also possible that, as  
367 suggested by the CLSM observations, a substantial amount of eDNA may be  
368 present in biofilms, although lacking most transforming activity. It is tempting to  
369 speculate that the DNA–protein complexes present in the ECM may hinder the

370 biological activity of eDNA as a transforming agent while contributing to the  
371 formation and preservation of the biofilm.

372 As reported for *Streptococcus mutans*, lysis-independent EV can transport  
373 DNA, contributing to horizontal gene transfer (56). Recent results also suggest  
374 that signal transduction mechanisms may be involved in the regulation of EV  
375 production in some Gram-positive bacteria (57, 58), but evidence for this is  
376 lacking in *S. pneumoniae*. As strongly suggested by the inhibitory effect of  
377 DNase I treatment in transforming efficiency, the biologically active eDNA  
378 released independent of detectable autolysis in *S. pneumoniae* appears to be  
379 located outside the EV. Although the loading of DNA into EV is thought to be  
380 widespread, experimental evidence showing that most EV-associated genomic  
381 DNA is present externally has been recently shown in *P. aeruginosa* (59, 60).  
382 However, other possibilities are also conceivable. For example, the stability of  
383 EV under various conditions may vary and a vesicle that loses membrane  
384 integrity may 'leak' its constituents into the supernatant (vesicle destabilization),  
385 rather than break up, as reported in *Bacillus anthracis*, *S. aureus* and other  
386 microorganisms (61). Interestingly, a very recent study has reported that the  
387 LytA NAM-amidase is not needed for production of EV, although the presence  
388 of EV-associated DNA was not analyzed (41).

389 An alternative (or complementary) mechanism for eDNA release may be  
390 bacterial type IV secretion systems (T4SS) that selectively deliver  
391 macromolecules to other cells or to the extracellular medium. An outstanding  
392 feature of these secretion systems is their ability to secrete both proteins and  
393 DNA molecules, a particularity that distinguishes them from other types of  
394 secretion system. The existence of a type IV secretion-like system involved in  
395 eDNA secretion was first described in *Neisseria gonorrhoeae* (62). More  
396 recently, it has been found that the release of eDNA from the cytoplasm of *H.*  
397 *influenzae* into the ECM requires the expression of an inner-membrane complex  
398 with homology to type IV secretion-like systems, plus the ComE outer-

399 membrane pore through which the type IV pilus is extruded (63). Type IV pili are  
400 surface-exposed fibers that mediate many functions in bacteria, including  
401 locomotion, adherence to eukaryotic cells, biofilm formation, DNA uptake  
402 (competence), and protein secretion. Although initially considered to be  
403 exclusive to Gram-negative bacteria, they are also present in Gram-positive,  
404 although their role(s) is just beginning to emerge (64). Recently, several studies  
405 have revealed the existence of type IV competence-induced pili —  
406 predominantly composed of the ComGC pilin (SPD\_1861; SPD\_RS09815) —  
407 on the surface of *S. pneumoniae* cells (65). Since these pili bind DNA, it has  
408 been proposed that the transformation pilus is the primary DNA receptor on the  
409 bacterial cell during transformation in *S. pneumoniae*. It is tempting to speculate  
410 that, during competence, intracellular DNA may also be secreted into the ECM  
411 with the participation of the type IV pili, perhaps involving the aqueous pore  
412 formed by ComEC (SPD\_0844; SPD\_RS0450) in the cytoplasmic membrane  
413 (66). Further studies are required to test this hypothesis.

## 414 MATERIALS AND METHODS

415 **Strains, media and growth conditions.** Table 3 lists the pneumococcal  
416 strains used in this study; all were grown in pH 8-adjusted C medium (CpH8)  
417 supplemented with 0.08% yeast extract (C+Y) medium, or not, as required (7).  
418 Cells were incubated at 37°C without shaking, and growth monitored by  
419 measuring absorbance at 550 nm ( $A_{550}$ ). When used, antibiotics were added at  
420 the following concentrations: erythromycin 0.5  $\mu\text{g ml}^{-1}$ , kanamycin 250  $\mu\text{g ml}^{-1}$ ,  
421 novobiocin 10  $\mu\text{g ml}^{-1}$ , optochin 5  $\mu\text{g ml}^{-1}$ , tetracycline 1  $\mu\text{g ml}^{-1}$ , spectinomycin  
422 100  $\mu\text{g ml}^{-1}$ , and streptomycin 100  $\mu\text{g ml}^{-1}$ . DNase I (from bovine pancreas,  
423 DN25) was purchased from Sigma-Aldrich. For the construction of mutants  
424 (Table 3), the appropriate *S. pneumoniae* strains were transformed with  
425 chromosomal or plasmid DNA in C medium supplemented with 0.08% bovine  
426 serum albumin after treating cells with 250  $\text{ng ml}^{-1}$  synthetic CSP-1 at 37°C for



427 10 min to induce competence, followed by incubation at 30°C during DNA  
428 uptake.

429 Biofilm formation was determined by the ability of cells to adhere to the walls  
430 and base of 96-well (flat-bottomed) polystyrene microtiter dishes (Costar 3595;  
431 Corning Incorporated), using a modification of a previously reported protocol  
432 (67). Unless stated otherwise, cells grown in C+Y medium to an  $A_{550}$  of  $\approx 0.5$ –  
433 0.6, sedimented by centrifugation, resuspended in an equal volume of the  
434 indicated pre-warmed medium, diluted 1/10 or 1/100, and then dispensed at a  
435 concentration of 200  $\mu$ l per well. Plates were incubated at 34°C for 3, 4.5 and 5  
436 h and bacterial growth determined by measuring the  $A_{595}$  using a VersaMax  
437 microplate absorbance reader (Molecular Devices). The biofilm formed was  
438 stained with 1% crystal violet (67).

439 **Intrabiofilm gene transfer.** Exponentially growing cultures of donor strains  
440 (see above) were seeded together in a 1:1 ratio in polystyrene microtiter plates  
441 and incubated in C+Y medium at 34°C. Previous results have indicated that  
442 biofilm-grown pneumococcal cells must be actively growing to become  
443 competent (26). Hence, biofilms formation was allowed for only 4.5 h; non-  
444 adherent cells were removed and adherent cells were washed with PBS,  
445 disaggregated by gentle pipetting and slow vortexing (4). The latter were then  
446 serially diluted and plated on blood agar plates containing Nov plus Str. Nov<sup>f</sup>  
447 Str<sup>f</sup> transformants were then picked from plates containing Opt to ascertain their  
448 parental strain. For each donor strain the total number of viable cells was  
449 determined using blood agar plates containing either Nov or Opt plus Str.

450 **Preparation of extracellular vesicles and microscopical examination.**  
451 EV-enriched centrifugation fractions were prepared from *S. pneumoniae*  
452 following standard procedures (61). Briefly, for biofilms, one liter of C+Y medium  
453 was inoculated with 10 ml of an exponentially growing culture of strain P271,  
454 distributed in 50 Petri dishes (10 cm diameter), and incubated at 34°C for 4.5 h.  
455 The non-adherent cells in the dishes were pipetted off and the biofilm-growing

456 cells ( $6-7 \times 10^9$  CFU) suspended in 75 ml of fresh C+Y medium. After  
457 centrifugation ( $9500 \times g$ , 20 min,  $4^\circ\text{C}$ ) the supernatant was filtered through a 0.2  
458  $\mu\text{m}$  pore-size filter (Millipore). The filtrate was centrifuged at  $100,000 \times g$  for 1 h  
459 at  $4^\circ\text{C}$  to sediment the vesicular fraction into a pellet. The supernatant was then  
460 discarded and the pellet suspended in a small volume of C+Y medium (EV  
461 fraction) and stored in aliquots at  $-20^\circ\text{C}$ . Aliquots of the EV fraction were also  
462 treated with DNase I ( $10 \mu\text{g ml}^{-1}$ ) for 1 h at  $37^\circ\text{C}$ . EDTA (50 mM), SDS (1%)  
463 and proteinase K ( $100 \mu\text{g ml}^{-1}$ ) were then added and the mixtures incubated for  
464 2 h at  $37^\circ\text{C}$ . Extraction was performed with phenol, and precipitation with  
465 ethanol, following standard procedures. Finally, the pellet was dissolved in a  
466 small volume of 10 mM Tris-HCl, pH 8.0 containing 1 mM EDTA. Cultures of the  
467 same pneumococcal strain were also grown under planktonic conditions until  
468 late exponential phase ( $\approx 3 \times 10^8$  CFU  $\text{ml}^{-1}$ ) at  $37^\circ\text{C}$  without agitation, and  
469 processed as biofilm-grown pneumococci for EV preparation.

470 EV preparations ( $7 \mu\text{l}$ ) were spotted on a glass slide, air dried, stained with  
471 the red fluorescence, membrane dye FM 4-64 (Molecular Probes), and  
472 incubated with  $\alpha$ -dsDNA (ab27156, Abcam) followed by incubation with Alexa  
473 fluor 488-labeled goat anti-mouse IgG (A-11001, Invitrogen) (see below).  
474 Specimens were observed under a Leica DM4000B fluorescence microscope  
475 and viewed under a Leica HC PL APO63  $\times/1.40-0.60$  oil objective. *S.*  
476 *pneumoniae* P271 biofilms formed on glass surfaces were prepared for low-  
477 temperature scanning electron microscopy (LTSEM) as previously described  
478 (7), and the samples observed at  $-135^\circ\text{C}$  using a DSM 960 Zeiss scanning  
479 electron microscope. For transmission electron microscopy (TEM) analysis,  $5 \mu\text{l}$   
480 of EV were placed for 5 min at room temperature on carbon-reinforced,  
481 Formvar-coated copper grids (300 mesh), which had been rendered hydrophilic  
482 by glow-discharge using a Quorum GloQube apparatus (Quorum  
483 Technologies). The sample was quickly washed with ultrapure water and  
484 negative staining was performed using 1% sodium phosphotungstate for 5 min.

485 The excess stain was removed, and the sample was allowed to dry.

486 Micrographs were taken on a JEOL JEM 1230 working at 80 kV.

487 **Quantification of eDNA.** DNA quantification was performed by  
488 spectrophotometry (with concentrated samples) and/or using genetic  
489 transformation experiments (68). It is well known that a first-order concentration  
490 dependence (near unity) exists in chromosomal DNA transformation in  
491 pneumococci and other bacteria. This was confirmed in this study (see Fig. S1  
492 in the supplemental material). It should be underlined that, since the size of the  
493 *S. pneumoniae* R6 genome is about 2 Mb, the DNA content of a single CFU,  
494 *i.e.*, a diplococcus, equals approximately 4 fg.

495 **Microscopic observation of biofilms.** For the observation of *S.*  
496 *pneumoniae* biofilms by CLSM, pneumococcal strains were grown on glass-  
497 bottomed dishes (WillCo-dish) for 3–5 h at 34°C as previously described (11).  
498 Following incubation, the culture medium was removed and the biofilm rinsed  
499 with phosphate-buffered saline (PBS) to remove non-adherent bacteria. The  
500 biofilms were then stained with DDAO (2  $\mu\text{M}$ ) (H6482, Invitrogen),  $\alpha$ -dsDNA (at  
501 2–25  $\mu\text{g ml}^{-1}$  each) and/or SYTO 59 (10  $\mu\text{M}$ ) (S11341, Invitrogen). All staining  
502 procedures involved incubation for 10–20 min at room temperature in the dark,  
503 except when biofilms were incubated with mouse  $\alpha$ -dsDNA (2  $\mu\text{g ml}^{-1}$ ); this  
504 involved a fixation step at room temperature with 3% paraformaldehyde for 10  
505 min. The biofilms were then rinsed with 0.5 ml PBS and incubated for 1 h at 4°C  
506 followed by 30 min incubation at room temperature in the dark with Alexa fluor  
507 488-labelled goat anti-mouse IgG (1:500). After staining, the biofilms were  
508 gently rinsed with 0.5 ml PBS. Observations were made at a magnification of  
509 63 $\times$  using a Leica TCS-SP2-AOBS-UV or TCS-SP5-AOBS-UV CLSM equipped  
510 with an argon ion laser. Laser intensity and gain were kept the same for all  
511 images. Images were analyzed using LCS software from LEICA. Projections  
512 were obtained in the x–y (individual scans at 0.5–1  $\mu\text{m}$  intervals) and x–z  
513 (images at 5–6  $\mu\text{m}$  intervals) planes.

514 **Statistical analysis.** Data comparisons were performed using the two-tailed  
515 Student *t*-test.

## 516 **ACKNOWLEDGMENTS**

517 We thank J.-P. Claverys and J. Vidal for kindly providing pneumococcal  
518 strains, M. Moscoso, P. García and J. Yuste for helpful comments and critical  
519 reading of the manuscript, A. Burton for revising the English version, M. T.  
520 Seisdedos and G. Elvira for their help with CLSM, and E. Cano and S. Ruiz for  
521 skillful technical assistance.

522 This research was supported by grant SAF2017-88664 from Ministerio de  
523 Economía, Industria y Competitividad (MEICOM). Centro de Investigación  
524 Biomédica en Red de Enfermedades Respiratorias (CIBERES) is an initiative of  
525 the Instituto de Salud Carlos III (ISCIII).

## 526 **REFERENCES**

- 527 1. Weiser JN. 2010. The pneumococcus: why a commensal misbehaves. *J*  
528 *Mol Med* 88:97-102. <https://doi.org/10.1007/s00109-009-0557-x>.
- 529 2. Domenech M, García E, Moscoso M. 2012. Biofilm formation in  
530 *Streptococcus pneumoniae*. *Microb Biotechnol* 5:455-465.  
531 <https://doi.org/10.1111/j.1751-7915.2011.00294.x>.
- 532 3. Chao Y, Marks LR, Pettigrew MM, Hakansson AP. 2015. *Streptococcus*  
533 *pneumoniae* biofilm formation and dispersion during colonization and  
534 disease. *Front Cell Infect Microbiol* 4:194.  
535 <https://doi.org/10.3389/fcimb.2014.00194>.
- 536 4. Domenech M, Ramos-Sevillano E, García E, Moscoso M, Yuste J. 2013.  
537 Biofilm formation avoids complement immunity and phagocytosis of  
538 *Streptococcus pneumoniae*. *Infect Immun* 81:2606-2615.  
539 <https://doi.org/10.1128/IAI.00491-13>.

- 540 5. Costerton JW, Lewandowski Z, Caldwell DE, Korber DR, Lappin-Scott HM.  
541 1995. Microbial biofilms. *Annu Rev Microbiol* 49:711-745.  
542 <https://doi.org/10.1146/annurev.mi.49.100195.003431>.
- 543 6. Okshevsky M, Meyer RL. 2015. The role of extracellular DNA in the  
544 establishment, maintenance and perpetuation of bacterial biofilms. *Crit Rev*  
545 *Microbiol* 41:341-352. <https://doi.org/10.3109/1040841X.2013.841639>.
- 546 7. Moscoso M, García E, López R. 2006. Biofilm formation by *Streptococcus*  
547 *pneumoniae*: role of choline, extracellular DNA, and capsular  
548 polysaccharide in microbial accretion. *J Bacteriol* 188:7785-7795.  
549 <https://doi.org/10.1128/JB.00673-06>.
- 550 8. Hall-Stoodley L, Nistico L, Sambanthamoorthy K, Dice B, Nguyen D,  
551 Mershon WJ, Johnson C, Hu FZ, Stoodley P, Ehrlich GD, Post JC. 2008.  
552 Characterization of biofilm matrix, degradation by DNase treatment and  
553 evidence of capsule downregulation in *Streptococcus pneumoniae* clinical  
554 isolates. *BMC Microbiol* 8:173. <https://doi.org/10.1186/1471-2180-8-173>.
- 555 9. Carrolo M, Frias MJ, Pinto FR, Melo-Cristino J, Ramirez M. 2010. Prophage  
556 spontaneous activation promotes DNA release enhancing biofilm formation  
557 in *Streptococcus pneumoniae*. *PLoS One* 5:e15678.  
558 <https://doi.org/10.1371/journal.pone.0015678>.
- 559 10. Trappetti C, Gualdi L, Di Meola L, Jain P, Korir C, Edmonds P, Iannelli F,  
560 Ricci S, Pozzi G, Oggioni M. 2011. The impact of the competence quorum  
561 sensing system on *Streptococcus pneumoniae* biofilms varies depending  
562 on the experimental model. *BMC Microbiol* 11:75.  
563 <https://doi.org/10.1186/1471-2180-11-75>.
- 564 11. Domenech M, García E, Prieto A, Moscoso M. 2013. Insight into the  
565 composition of the intercellular matrix of *Streptococcus pneumoniae*  
566 biofilms. *Environ Microbiol* 15:502-516. [https://doi.org/10.1111/j.1462-](https://doi.org/10.1111/j.1462-2920.2012.02853.x)  
567 [2920.2012.02853.x](https://doi.org/10.1111/j.1462-2920.2012.02853.x).

- 568 12. Domenech M, Ruiz S, Moscoso M, García E. 2015. *In vitro* biofilm  
569 development of *Streptococcus pneumoniae* and formation of choline-  
570 binding protein–DNA complexes. *Environ Microbiol Rep* 7:715-727.  
571 <https://doi.org/10.1111/1758-2229.12295>.
- 572 13. Schulte T, Mikaelsson C, Beaussart A, Kikhney A, Deshmukh M, Wolniak  
573 S, Pathak A, Ebel C, Löfling J, Fogolari F, Henriques-Normark B, Dufrêne  
574 YF, Svergun D, Nygren P-Å, Achour A. 2016. The BR domain of PsrP  
575 interacts with extracellular DNA to promote bacterial aggregation; structural  
576 insights into pneumococcal biofilm formation. *Sci Rep* 6:32371.  
577 <https://doi.org/10.1038/srep32371>.
- 578 14. Arenas J, Tommassen J. 2017. Meningococcal biofilm formation: let's stick  
579 together. *Trends Microbiol* 25:113-124.  
580 <https://doi.org/10.1016/j.tim.2016.09.005>.
- 581 15. Höltje JV, Tomasz A. 1975. Biological effects of lipoteichoic acids. *J*  
582 *Bacteriol* 124:1023-1027.
- 583 16. Sandalova T, Lee M, Henriques-Normark B, Hesek D, Mobashery S,  
584 Mellroth P, Achour A. 2016. The crystal structure of the major  
585 pneumococcal autolysin LytA in complex with a large peptidoglycan  
586 fragment reveals the pivotal role of glycans for lytic activity. *Mol Microbiol*  
587 101:954-967. <https://doi.org/10.1111/mmi.13435>.
- 588 17. García P, González MP, García E, García JL, López R. 1999. The  
589 molecular characterization of the first autolytic lysozyme of *Streptococcus*  
590 *pneumoniae* reveals evolutionary mobile domains. *Mol Microbiol* 33:128-  
591 138. <https://doi.org/10.1046/j.1365-2958.1999.01455.x>.
- 592 18. Molina R, González A, Stelter M, Pérez-Dorado I, Kahn R, Morales M,  
593 Moscoso M, Campuzano S, Campillo NE, Mobashery S, García JL, García  
594 P, Hermoso JA. 2009. Crystal structure of CbpF, a bifunctional choline-  
595 binding protein and autolysis regulator from *Streptococcus pneumoniae*.  
596 *EMBO Rep* 10:246-251. <https://doi.org/10.1038/embo.2008.245>.

- 597 19. Ibáñez de Aldecoa AL, Zafra O, González-Pastor JE. 2017. Mechanisms  
598 and regulation of extracellular DNA release and its biological roles in  
599 microbial communities. *Front Microbiol* 8:1390.  
600 <https://doi.org/10.3389/fmicb.2017.01390>.
- 601 20. Ottolenghi E, Hotchkiss RD. 1962. Release of genetic transforming agent  
602 from pneumococcal cultures during growth and disintegration. *J Exp Med*  
603 116:491-519. <https://doi.org/10.1084/jem.116.4.491>.
- 604 21. Moscoso M, Claverys J-P. 2004. Release of DNA into the medium by  
605 competent *Streptococcus pneumoniae*: kinetics, mechanism and stability of  
606 the liberated DNA. *Mol Microbiol* 54:783-794. [https://doi.org/10.1111/j.1365-  
607 2958.2004.04305.x](https://doi.org/10.1111/j.1365-2958.2004.04305.x).
- 608 22. Kausmally L, Johnsborg O, Lunde M, Knutsen E, Håvarstein LS. 2005.  
609 Choline-binding protein D (CbpD) in *Streptococcus pneumoniae* is essential  
610 for competence-induced cell lysis. *J Bacteriol* 187:4338-4345.  
611 <https://doi.org/10.1128/JB.187.13.4338-4345.2005>.
- 612 23. Claverys J-P, Håvarstein LS. 2007. Cannibalism and fratricide:  
613 mechanisms and raisons d'être. *Nat Rev Microbiol* 5:219-229.  
614 <https://doi.org/10.1038/nrmicro1613>.
- 615 24. Shanker E, Federle JM. 2017. Quorum sensing regulation of competence  
616 and bacteriocins in *Streptococcus pneumoniae* and *mutans*. *Genes* 8:15.  
617 <https://doi.org/10.3390/genes8010015>.
- 618 25. Guiral S, Mitchell TJ, Martin B, Claverys J-P. 2005. Competence-  
619 programmed predation of noncompetent cells in the human pathogen  
620 *Streptococcus pneumoniae*: genetic requirements. *Proc Natl Acad Sci U S*  
621 *A* 102:8710-8715. <https://doi.org/10.1073/pnas.0500879102>.
- 622 26. Wei H, Håvarstein LS. 2012. Fratricide is essential for efficient gene  
623 transfer between pneumococci in biofilms. *Appl Environ Microbiol* 78:5897-  
624 5905. <https://doi.org/10.1128/aem.01343-12>.

- 625 27. Trappetti C, Potter AJ, Paton AW, Oggioni MR, Paton JC. 2011. LuxS  
626 mediates iron-dependent biofilm formation, competence and fratricide in  
627 *Streptococcus pneumoniae*. Infect Immun 79:4550-4558.  
628 <https://doi.org/10.1128/iai.05644-11>.
- 629 28. Schlafer S, Meyer RL. 2017. Confocal microscopy imaging of the biofilm  
630 matrix. J Microbiol Methods 138:50-59.  
631 <https://doi.org/10.1016/j.mimet.2016.03.002>.
- 632 29. Okshevsky M, Meyer RL. 2014. Evaluation of fluorescent stains for  
633 visualizing extracellular DNA in biofilms. J Microbiol Methods 105:102-104.  
634 <https://doi.org/10.1016/j.mimet.2014.07.010>.
- 635 30. Andre GO, Converso TR, Politano WR, Ferraz LFC, Ribeiro ML, Leite LCC,  
636 Darrieux M. 2017. Role of *Streptococcus pneumoniae* proteins in evasion of  
637 complement-mediated immunity. Front Microbiol 8:224.  
638 <https://doi.org/10.3389/fmicb.2017.00224>.
- 639 31. López R, García E. 2004. Recent trends on the molecular biology of  
640 pneumococcal capsules, lytic enzymes, and bacteriophage. FEMS  
641 Microbiol Rev 28:553-580. <https://doi.org/10.1016/j.femsre.2004.05.002>.
- 642 32. Steinmoen H, Knutsen E, Håvarstein LS. 2002. Induction of natural  
643 competence in *Streptococcus pneumoniae* triggers lysis and DNA release  
644 from a subfraction of the cell population. Proc Natl Acad Sci U S A 99:7681-  
645 7686. <https://doi.org/10.1073/pnas.112464599>.
- 646 33. Moscoso M, Domenech M, García E. 2010. Vancomycin tolerance in  
647 clinical and laboratory *Streptococcus pneumoniae* isolates depends on  
648 reduced enzyme activity of the major LytA autolysin or cooperation between  
649 CiaH histidine kinase and capsular polysaccharide. Mol Microbiol 77:1052-  
650 1064. <https://doi.org/10.1111/j.1365-2958.2010.07271.x>.
- 651 34. Johnston C, Hauser C, Hermans PWM, Martin B, Polard P, Bootsma HJ,  
652 Claverys J-P. 2016. Fine-tuning of choline metabolism is important for



- 653 pneumococcal colonization. *Mol Microbiol* 100:972-988.  
654 <https://doi.org/10.1111/mmi.13360>.
- 655 35. Laux A, Sexauer A, Sivaselvarajah D, Kaysen A, Brückner R. 2015. Control  
656 of competence by related non-coding csRNAs in *Streptococcus*  
657 *pneumoniae* R6. *Front Genet* 6:246.  
658 <https://doi.org/10.3389/fgene.2015.00246>.
- 659 36. Muñoz R, Bustamante M, de la Campa AG. 1995. Ser-127-to-Leu  
660 substitution in the DNA gyrase B subunit of *Streptococcus pneumoniae* is  
661 implicated in novobiocin resistance. *J Bacteriol* 177:4166-4170.  
662 <https://doi.org/10.1128/jb.177.14.4166-4170.1995>.
- 663 37. Salles C, Créancier L, Claverys J-P, Méjean V. 1992. The high level  
664 streptomycin resistance gene from *Streptococcus pneumoniae* is a  
665 homologue of the ribosomal protein S12 gene from *Escherichia coli*.  
666 *Nucleic Acids Res* 20:6103. <https://doi.org/10.1093/nar/20.22.6103>.
- 667 38. Claverys J-P, Lacks SA. 1986. Heteroduplex deoxyribonucleic acid base  
668 mismatch repair in bacteria. *Microbiol Rev* 50:133-165.
- 669 39. Olaya-Abril A, Prados-Rosales R, McConnell MJ, Martín-Peña R,  
670 González-Reyes JA, Jiménez-Munguía I, Gómez-Gascón L, Fernández J,  
671 Luque-García JL, García-Lidón C, Estévez H, Pachón J, Obando I,  
672 Casadevall A, Pirofski L-a, Rodríguez-Ortega MJ. 2014. Characterization of  
673 protective extracellular membrane-derived vesicles produced by  
674 *Streptococcus pneumoniae*. *J Proteomics* 106:46-60.  
675 <https://doi.org/10.1016/j.jprot.2014.04.023>.
- 676 40. Volgers C, Benedikter BJ, Grauls GE, Hellebrand PHM, Savelkoul PHM,  
677 Stassen FRM. 2017. Effects of N-acetyl-L-cysteine on the membrane  
678 vesicle release and growth of respiratory pathogens. *FEMS Microbiol Lett*  
679 364:fnx087. <https://doi.org/10.1093/femsle/fnx087>.
- 680 41. Codemo M, Muschiol S, Iovino F, Nannapaneni P, Plant L, Wai SN,  
681 Henriques-Normark B. 2018. Immunomodulatory effects of pneumococcal

- 682 extracellular vesicles on cellular and humoral host defenses. *mBio*  
683 9:e00559-00518. <https://doi.org/10.1128/mBio.00559-18>.
- 684 42. Whitchurch CB, Tolker-Nielsen T, Ragas PC, Mattick JS. 2002.  
685 Extracellular DNA required for bacterial biofilm formation. *Science*  
686 295:1487. <https://doi.org/10.1126/science.295.5559.1487>.
- 687 43. Yang CL, Chilvers M, Montgomery M, Nolan SJ. 2017. Dornase alfa for  
688 cystic fibrosis. *Paediatr Respir Rev* 21:65-67.  
689 <https://doi.org/10.1016/j.prrv.2016.09.001>.
- 690 44. Magana M, Sereti C, Ioannidis A, Mitchell CA, Ball AR, Magiorkinis E,  
691 Chatzipanagiotou S, Hamblin MR, Hadjifrangiskou M, Tegos GP. 2018.  
692 Options and limitations in clinical investigation of bacterial biofilms. *Clin*  
693 *Microbiol Rev* 31:e00084-00016. <https://doi.org/10.1128/cmr.00084-16>.
- 694 45. Barnes AMT, Ballering KS, Leibman RS, Wells CL, Dunny GM. 2012.  
695 *Enterococcus faecalis* produces abundant extracellular structures  
696 containing DNA in the absence of cell lysis during early biofilm formation.  
697 *mBio* 3:e00193-00112. <https://doi.org/10.1128/mBio.00193-12>.
- 698 46. Domenech M, Pedrero-Vega E, Prieto A, García E. 2016. Evidence of the  
699 presence of nucleic acids and  $\beta$ -glucan in the matrix of non-typeable  
700 *Haemophilus influenzae in vitro* biofilms. *Sci Rep* 6:36424.  
701 <https://doi.org/10.1038/srep36424>.
- 702 47. Sugimoto S, Okuda K-i, Miyakawa R, Sato M, Arita-Morioka K-i, Chiba A,  
703 Yamanaka K, Ogura T, Mizunoe Y, Sato C. 2016. Imaging of bacterial  
704 multicellular behaviour in biofilms in liquid by atmospheric scanning electron  
705 microscopy. *Sci Rep* 6:25889. <https://doi.org/10.1038/srep25889>.
- 706 48. Okuda K-i, Nagahori R, Yamada S, Sugimoto S, Sato C, Sato M, Iwase T,  
707 Hashimoto K, Mizunoe Y. 2018. The composition and structure of biofilms  
708 developed by *Propionibacterium acnes* isolated from cardiac pacemaker  
709 devices. *Front Microbiol* 9:182. <https://doi.org/10.3389/fmicb.2018.00182>.

- 710 49. Johnsborg O, Eldholm V, Bjørnstad ML, Håvarstein LS. 2008. A predatory  
711 mechanism dramatically increases the efficiency of lateral gene transfer in  
712 *Streptococcus pneumoniae* and related commensal species. Mol Microbiol  
713 69:245-253. <https://doi.org/10.1111/j.1365-2958.2008.06288.x>.
- 714 50. Zafra O, Lamprecht-Grandío M, González de Figueras C, González-Pastor  
715 JE. 2012. Extracellular DNA release by undomesticated *Bacillus subtilis* is  
716 regulated by early competence. PLoS One 7:e48716.  
717 <https://doi.org/10.1371/journal.pone.0048716>.
- 718 51. Paganelli FL, Willems RJL, Jansen P, Hendrickx A, Zhang X, Bonten MJM,  
719 Leavis HL. 2013. *Enterococcus faecium* biofilm formation: identification of  
720 major autolysin AtlA<sub>Efm</sub>, associated Acm surface localization, and AtlA<sub>Efm</sub>-  
721 independent extracellular DNA release. mBio 4:e00154.  
722 <https://doi.org/10.1128/mBio.00154-13>.
- 723 52. Rajendran NB, Eikmeier J, Becker K, Hussain M, Peters G, Heilmann C.  
724 2015. Important contribution of the novel locus *comEB* to extracellular DNA-  
725 dependent *Staphylococcus lugdunensis* biofilm formation. Infect Immun  
726 83:4682-4692. <https://doi.org/10.1128/iai.00775-15>.
- 727 53. DeFrancesco AS, Masloboeva N, Syed AK, DeLoughery A, Bradshaw N, Li  
728 G-W, Gilmore MS, Walker S, Losick R. 2017. Genome-wide screen for  
729 genes involved in eDNA release during biofilm formation by *Staphylococcus*  
730 *aureus*. Proc Natl Acad Sci U S A 114:E5969-E5978.  
731 <https://doi.org/10.1073/pnas.1704544114>.
- 732 54. Hunter RC, Beveridge TJ. 2005. Application of a pH-sensitive fluoroprobe  
733 (C-SNARF-4) for pH microenvironment analysis in *Pseudomonas*  
734 *aeruginosa* biofilms. Appl Environ Microbiol 71:2501-2510.  
735 <https://doi.org/10.1128/aem.71.5.2501-2510.2005>.
- 736 55. Ronda-Lain C, Lopez R, Tapia A, Tomasz A. 1977. Role of the  
737 pneumococcal autolysin (murein hydrolase) in the release of phage

- 738 progeny bacteriophage and in the bacteriophage-induced lysis of the host  
739 cells. *J Virol* 21:366-374.
- 740 56. Liao S, Klein MI, Heim KP, Fan Y, Bitoun JP, Ahn S-J, Burne RA, Koo H,  
741 Brady LJ, Wen ZT. 2014. *Streptococcus mutans* extracellular DNA is  
742 upregulated during growth in biofilms, actively released via membrane  
743 vesicles, and influenced by components of the protein secretion machinery.  
744 *J Bacteriol* 196:2355-2366. <https://doi.org/10.1128/jb.01493-14>.
- 745 57. Resch U, Tsatsaronis JA, Le Rhun A, Stübiger G, Rohde M, Kasvandik S,  
746 Holzmeister S, Tinnefeld P, Wai SN, Charpentier E. 2016. A two-  
747 component regulatory system impacts extracellular membrane-derived  
748 vesicle production in group A *Streptococcus*. *mBio* 7:e00207-00216.  
749 <https://doi.org/10.1128/mBio.00207-16>.
- 750 58. Obana N, Nakao R, Nagayama K, Nakamura K, Senpuku H, Nomura N,  
751 Bäumlér AJ. 2017. Immunoactive clostridial membrane vesicle production is  
752 regulated by a sporulation factor. *Infect Immun* 85:e00096-00017.  
753 <https://doi.org/10.1128/iai.00096-17>.
- 754 59. Renelli M, Matias V, Lo RY, Beveridge TJ. 2004. DNA-containing  
755 membrane vesicles of *Pseudomonas aeruginosa* PAO1 and their genetic  
756 transformation potential. *Microbiology* 150:2161-2169.  
757 <https://doi.org/10.1099/mic.0.26841-0>.
- 758 60. Bitto NJ, Chapman R, Pidot S, Costin A, Lo C, Choi J, D'Cruze T, Reynolds  
759 EC, Dashper SG, Turnbull L, Whitchurch CB, Stinear TP, Stacey KJ,  
760 Ferrero RL. 2017. Bacterial membrane vesicles transport their DNA cargo  
761 into host cells. *Sci Rep* 7:7072. [https://doi.org/10.1038/s41598-017-07288-](https://doi.org/10.1038/s41598-017-07288-4)  
762 4.
- 763 61. Brown L, Wolf JM, Prados-Rosales R, Casadevall A. 2015. Through the  
764 wall: extracellular vesicles in Gram-positive bacteria, mycobacteria and  
765 fungi. *Nat Rev Microbiol* 13:620-630. <https://doi.org/10.1038/nrmicro3480>.

- 766 62. Hamilton HL, Domínguez NM, Schwartz KJ, Hackett KT, Dillard JP. 2005.  
767 *Neisseria gonorrhoeae* secretes chromosomal DNA via a novel type IV  
768 secretion system. *Mol Microbiol* 55:1704-1721.  
769 <https://doi.org/10.1111/j.1365-2958.2005.04521.x>.
- 770 63. Jurcisek JA, Brockman KL, Novotny LA, Goodman SD, Bakaletz LO. 2017.  
771 Nontypeable *Haemophilus influenzae* releases DNA and DNABII proteins  
772 via a T4SS-like complex and ComE of the type IV pilus machinery. *Proc*  
773 *Natl Acad Sci U S A* 114:E6632-E6641.  
774 <https://doi.org/10.1073/pnas.1705508114>.
- 775 64. Melville S, Craig L. 2013. Type IV pili in Gram-positive bacteria. *Microbiol*  
776 *Mol Biol Rev* 77:323-341. <https://doi.org/10.1128/mubr.00063-12>.
- 777 65. Laurenceau R, Péhau-Arnaudet G, Baconnais S, Gault J, Malosse C,  
778 Dujancourt A, Campo N, Chamot-Rooke J, Le Cam E, Claverys J-P,  
779 Fronzes R. 2013. A type IV pilus mediates DNA binding during natural  
780 transformation in *Streptococcus pneumoniae*. *PLoS Pathog* 9:e1003473.  
781 <https://doi.org/10.1371/journal.ppat.1003473>.
- 782 66. Bergé M, Moscoso M, Prudhomme M, Martin B, Claverys J-P. 2002.  
783 Uptake of transforming DNA in Gram-positive bacteria: a view from  
784 *Streptococcus pneumoniae*. *Mol Microbiol* 45:411-421.  
785 <https://doi.org/10.1046/j.1365-2958.2002.03013.x>.
- 786 67. Domenech M, Araújo-Bazán L, García E, Moscoso M. 2014. *In vitro* biofilm  
787 formation by *Streptococcus pneumoniae* as a predictor of post-vaccination  
788 emerging serotypes colonizing the human nasopharynx. *Environ Microbiol*  
789 16:1193-1201. <https://doi.org/10.1111/1462-2920.12370>.
- 790 68. Hotchkiss RD. 1957. Methods for characterization of nucleic acid. *Methods*  
791 *Enzymol* 3:708-715. [https://doi.org/10.1016/S0076-6879\(57\)03448-5](https://doi.org/10.1016/S0076-6879(57)03448-5).
- 792 69. Hoskins J, Alborn WE, Jr., Arnold J, Blaszcak LC, Burgett S, DeHoff BS,  
793 Estrem ST, Fritz L, Fu D-J, Fuller W, Geringer C, Gilmour R, Glass JS,  
794 Khoje H, Kraft AR, Lagace RE, LeBlanc DJ, Lee LN, Lefkowitz EJ, Lu J,

- 795 Matsushima P, McAhren SM, McHenney M, McLeaster K, Mundy CW,  
796 Nicas TI, Norris FH, O'gara M, Peery RB, Robertson GT, Rockey P, Sun P-  
797 M, Winkler ME, Yang Y, Young-Bellido M, Zhao G, Zook CA, Baltz RH,  
798 Jaskunas R, Rosteck PRJ, Skatrud PL, Glass JI. 2001. Genome of the  
799 bacterium *Streptococcus pneumoniae* strain R6. J Bacteriol 183:5709-  
800 5717. <https://doi.org/10.1128/JB.183.19.5709-5717.2001>.
- 801 70. Martin B, Prats H, Claverys J-P. 1985. Cloning of the *hexA* mismatch-repair  
802 gene of *Streptococcus pneumoniae* and identification of the product. Gene  
803 34:293-303. [https://doi.org/10.1016/0378-1119\(85\)90138-6](https://doi.org/10.1016/0378-1119(85)90138-6).
- 804 71. Ronda C, García JL, López R. 1988. Characterization of genetic  
805 transformation in *Streptococcus oralis* NCTC 11427: expression of the  
806 pneumococcal amidase in *S. oralis* using a new shuttle vector. Mol Gen  
807 Genet 215:53-57. <https://doi.org/10.1007/BF00331302>.
- 808 72. Fenoll A, Muñoz R, García E, de la Campa AG. 1994. Molecular basis of  
809 the optochin-sensitive phenotype of pneumococcus: characterization of the  
810 genes encoding the F<sub>0</sub> complex of the *Streptococcus pneumoniae* and  
811 *Streptococcus oralis* H<sup>+</sup>-ATPases. Mol Microbiol 12:587-598.  
812 <https://doi.org/10.1111/j.1365-2958.1994.tb01045.x>.
- 813 73. Vidal JE, Ludewick HP, Kunkel RM, Zähler D, Klugman KP. 2011. The  
814 LuxS-dependent quorum-sensing system regulates early biofilm formation  
815 by *Streptococcus pneumoniae* strain D39. Infect Immun 79:4050-4060.  
816 <https://doi.org/10.1128/iai.05186-11>.
- 817 74. Vidal JE, Howery KE, Ludewick HP, Nava P, Klugman KP. 2013. Quorum-  
818 sensing systems LuxS/autoinducer 2 and Com regulate *Streptococcus*  
819 *pneumoniae* biofilms in a bioreactor with living cultures of human  
820 respiratory cells. Infect Immun 81:1341-1353.  
821 <https://doi.org/10.1128/iai.01096-12>.

822

823

824

825 **TABLE 1** Transformation efficiency in *S. pneumoniae* biofilms<sup>a</sup>

| Strain                                                    |                                                                            | Transformation frequency <sup>b</sup>         |                                               |
|-----------------------------------------------------------|----------------------------------------------------------------------------|-----------------------------------------------|-----------------------------------------------|
|                                                           |                                                                            | Str <sup>r</sup>                              | Nov <sup>r</sup>                              |
| P233 (Nov <sup>r</sup> )                                  | P273 (Opt <sup>r</sup> Str <sup>r</sup> )                                  | 0.45 ± 0.10                                   | 0.04 ± 0.02                                   |
| P272 ( <i>lytA lytC</i><br><i>cbpD</i> Nov <sup>r</sup> ) | P271 ( <i>lytA lytC</i><br><i>cbpD</i> Opt <sup>r</sup> Str <sup>r</sup> ) | $0.27 \times 10^{-2} \pm 0.05 \times 10^{-2}$ | $0.30 \times 10^{-3} \pm 0.19 \times 10^{-3}$ |

826 <sup>a</sup>Exponentially growing cultures of the indicated donor (and recipient) strains  
827 were mixed in polystyrene microtiter plates and incubated in C+Y medium at  
828 34°C. After 4.5 h incubation, non-adherent cells were removed and biofilm-  
829 grown cells were washed and resuspended with PBS, diluted, and plated on  
830 blood agar plates containing Nov plus Str. Nov<sup>r</sup> Str<sup>r</sup> transformants were then  
831 picked from plates containing Opt to ascertain their parental strain. Total viable  
832 cells of each strain were determined using plates containing either Nov or Opt  
833 plus Str, and ranged from  $1.5 \times 10^8$  to  $1.8 \times 10^8$  for P233 + P273 biofilms, and  
834 from  $3.2 \times 10^8$  to  $3.4 \times 10^8$  CFU ml<sup>-1</sup> for P272 + P271 biofilms.

835 <sup>b</sup>Transformation frequency is defined as the number of transformants (CFU ml<sup>-1</sup>  
836 <sup>1</sup>) multiplied by 100, divided by the total number of bacteria (CFU ml<sup>-1</sup>). Values  
837 correspond to the means ± standard errors for four independent experiments.

838

839 **TABLE 2** Transforming eDNA in pneumococcal biofilms and planktonic  
840 cultures<sup>a</sup>

| DNA origin              | Total DNA content ( $\mu\text{g}$ ) | Cell equivalents (%)        |
|-------------------------|-------------------------------------|-----------------------------|
| Biofilm                 |                                     |                             |
| Intracellular           | 65                                  | $1.6 \times 10^{10}$ (100)  |
| EV-associated           | $7.5 \times 10^{-5}$                | $1.9 \times 10^4$ (0.00012) |
| EV-associated + DNase I | ND                                  | –                           |
| Planktonic culture      |                                     |                             |
| Intracellular           | $3 \times 10^3$                     | $7.5 \times 10^{11}$ (100)  |
| EV-associated           | $1.2 \times 10^{-2}$                | $3 \times 10^6$ (0.0004)    |
| EV-associated + DNase I | ND                                  | –                           |

841 <sup>a</sup>EV were prepared from biofilms or planktonic cultures of strain P271 (*lytA lytC*  
842 *cbpD* Opt<sup>f</sup>; Str<sup>r</sup>) and DNA was purified as described under Materials and  
843 Methods. Total chromosomal DNA (intracellular) was also purified. Competent  
844 R6 cells were used as recipients in transformation experiments. Transformants  
845 were selected using streptomycin-containing plates. Results are the means for  
846 three independent determinations. ND, not detected.

847



848 **TABLE 3** *S. pneumoniae* strains used

| Strain | Description <sup>a</sup>                                                                                                         | Source or reference |
|--------|----------------------------------------------------------------------------------------------------------------------------------|---------------------|
| R6     | Nonencapsulated D39 derivative; <i>lytA</i> <sup>+</sup>                                                                         | 69                  |
| R6BC   | R6 <i>lytB::ermC lytC::tet</i> ; Ery <sup>r</sup> Tet <sup>r</sup>                                                               | 7                   |
| R800   | R6 derivative                                                                                                                    | 70                  |
| M22    | A laboratory multi-resistant strain; <i>nov1 str41</i> ; Nov <sup>r</sup> ; Str <sup>r</sup>                                     | 71                  |
| M222   | M22 derivative; M22 transformed with <i>Streptococcus oralis</i> NCTC 11427 chromosomal DNA; Opt <sup>r</sup> ; Str <sup>r</sup> | 72                  |
| SPJV05 | D39 derivative <i>luxS</i> null mutant, Ery <sup>r</sup>                                                                         | 73                  |
| SPJV10 | D39 derivative <i>comC</i> null mutant, Ery <sup>r</sup>                                                                         | 74                  |
| P042   | R800 but <i>lytA::aphIII lytC::tet</i> ; Kan <sup>r</sup> Tet <sup>r</sup>                                                       | 7                   |
| P046   | R800 but <i>lytA::aphIII lytC::ermC</i> ; Kan <sup>r</sup> Ery <sup>r</sup>                                                      | 7                   |
| P104   | R6 but <i>lytA::cat</i> ; Cm <sup>r</sup>                                                                                        | This study          |
| P147   | R6 <i>ciaH</i> <sub>Tupelo_VT</sub>                                                                                              | 33                  |
| P203   | R391 but <i>cbpD::spc</i> ; R391 transformed with R1582 chromosomal DNA; Spc <sup>r</sup>                                        | This study          |
| P204   | P042 but <i>cbpD::spc</i> ; P042 transformed with R1582 chromosomal DNA; Spc <sup>r</sup>                                        | This study          |
| P211   | P104 but <i>comA::kan</i> ; P104 transformed with R391 chromosomal DNA; Kan <sup>r</sup>                                         | This study          |
| P213   | P211 but <i>lytC</i> ; P211 transformed with R6BC chromosomal DNA; Tet <sup>r</sup>                                              | This study          |
| P233   | R6 transformed with M22 chromosomal DNA; Nov <sup>r</sup>                                                                        | This study          |
| P234   | R6 <i>pspC</i> ; spontaneous mutant <sup>b</sup>                                                                                 | This study          |
| P235   | R6 but <i>luxS</i> null mutant; R6 transformed with SPJV05 chromosomal DNA; Ery <sup>r</sup>                                     | This study          |

|       |                                                                                              |            |
|-------|----------------------------------------------------------------------------------------------|------------|
| P236  | R6 but <i>comC</i> null mutant; R6 transformed with SPJV10 chromosomal DNA; Ery <sup>r</sup> | This study |
| P271  | P204 transformed with M222 chromosomal DNA; Opt <sup>r</sup> ; Str <sup>r</sup>              | This study |
| P272  | P204 transformed with M222 chromosomal DNA; Nov <sup>r</sup>                                 | This study |
| P273  | R6 transformed with M222 chromosomal DNA; Opt <sup>r</sup> ; Str <sup>r</sup>                | This study |
| R391  | R800 but <i>comA::kan</i> ; Kan <sup>r</sup>                                                 | 25         |
| R1582 | R800 but <i>cbpD::spc</i> ; Spc <sup>r</sup>                                                 | 25         |

---

849 <sup>a</sup>Cm, chloramphenicol; Ery, erythromycin; Kan, kanamycin; Nov, novobiocin;  
850 Opt, optochin; Tet, tetracycline; Spc, spectinomycin; Str, streptomycin; VT,  
851 vancomycin tolerance. <sup>r</sup>, resistant.

852 <sup>b</sup>The *pspC* mutation corresponds to a single base substitution (G:C to A:T)  
853 converting Trp (TGG) at position 512 to a stop codon (TAG). The wild type  
854 *pspC* gene encodes a 701 amino acid residue-long protein.

855

856

857

## FIGURE LEGENDS

858 **FIG 1** Evidence of the existence of eDNA in pneumococcal biofilms using  
859 CLSM. A biofilm of *S. pneumoniae* R6 grown for 5 h at 34°C in C+Y medium  
860 was stained with a combination of SYTO 59 (A, red), DDAO (B, blue), and  $\alpha$ -  
861 dsDNA, followed by Alexa Fluor-488 goat anti-mouse IgG (C, green). Image D  
862 is a merge of channels A and B. Image E is a merge of channels A and C.  
863 Image F is a merge of channels B and C. Image G is a merge of the three  
864 channels. Images H, I and J correspond, respectively, to an enlarged vision of  
865 the area marked with squares in D, E and F. Yellow arrows point to eDNA  
866 stained only with DDAO or  $\alpha$ -dsDNA–Alexa Fluor-488. White arrows indicate  
867 the location of SYTO 59-stained bacteria together with eDNA labelled either  
868 with DDAO (H, magenta) or with  $\alpha$ -dsDNA–Alexa Fluor-488 (I, yellow). The red  
869 arrow in image J points to doubly labelled (DDAO plus  $\alpha$ -dsDNA–Alexa Fluor-  
870 488) eDNA (J, light blue). Scale bars = 25  $\mu$ m.

871 **FIG 2** Dynamics of eDNA release in pneumococcal biofilms. *S. pneumoniae*  
872 R6 was grown under biofilm-forming conditions. After 3 and 5 h incubation at  
873 34°C, adherent (biofilm) and non-adherent (planktonic) cells were independently  
874 stained with a combination of SYTO 59 (red) and  $\alpha$ -dsDNA–Alexa Fluor-488  
875 (green). Scale bars = 25  $\mu$ m.

876 **FIG 3** Inhibition and dispersal of pneumococcal biofilms with DNase I. (A)  
877 The indicated *S. pneumoniae* strains were grown overnight at 37°C to an  $A_{550}$   
878 value of 0.5 (corresponding to the late exponential phase of growth) in C+Y  
879 medium, centrifuged, and adjusted to an  $A_{550}$  of 0.6 with fresh medium. The cell  
880 suspensions were then diluted 100-fold, and 200  $\mu$ l aliquots distributed into the  
881 wells of microtiter plates, which were then incubated for 5 h at 34°C (open  
882 bars). Other samples received DNase I (100  $\mu$ g ml<sup>-1</sup>) (red bars) and were  
883 incubated as above (inhibition assay). In other cases, and after biofilm  
884 development (4 h at 34°C), DNase I (green bars) was added at 100  $\mu$ g ml<sup>-1</sup>,

885 and incubation allowed to proceed for an additional 1 h at 34°C before staining  
886 with CV to quantify biofilm formation (dispersal assay). In all assays, black bars  
887 indicate growth (adherent plus non-adherent cells). \*,  $P < 0.001$  compared with  
888 the corresponding, untreated control.

889 **FIG 4** Influence of autolysins on biofilm formation and eDNA release revealed  
890 by CLSM. Biofilms were stained with a combination of SYTO 59 (red), and  $\alpha$ -  
891 dsDNA, followed by Alexa Fluor-488 goat anti-mouse IgG (green). The R6  
892 strain was also incubated in C+Y medium containing 2% choline chloride (R6 +  
893 2% cho). Horizontal and vertical three-dimensional reconstructions of 55 ( $x$ - $y$   
894 plane) or 65 scans ( $x$ - $z$  plane) are shown. Scale bars = 25  $\mu$ m.

895 **FIG 5** Influence of competence induction on biofilm formation and eDNA  
896 release revealed by CLSM. Biofilms were stained with a combination of SYTO  
897 59 (red), and  $\alpha$ -dsDNA, followed by Alexa Fluor-488 goat anti-mouse IgG  
898 (green). Scale bars = 25  $\mu$ m.

899

900

901 **Supplemental Material**

902 Additional information may be found in the online version of this article:

903

904 **FIG S1** Calibration curve for *S. pneumoniae*-transforming DNA. Competent  
905 R6 cells were used as recipient bacteria. Values represent the means  $\pm$   
906 standard errors for three independent transformation experiments. The dotted  
907 line corresponds to a slope of 1.

908 **FIG S2** Observation of EV produced by *S. pneumoniae* P271. (A–C)  
909 Fluorescent labeling of an EV preparation with FM 4-64 (red; A) and  $\alpha$ -dsDNA,  
910 followed by incubation with Alexa fluor 488-labeled goat anti-mouse IgG (green;  
911 B). Image C is a merger of the two channels. Scale bars = 10  $\mu$ m. (D–E)  
912 Electron micrographs of EVs. (D) LTSEM image of a pneumococcal biofilm.  
913 Arrows point to spherical blebs protruding from cells. The arrowhead indicates a  
914 putatively cell extruded EV. (E, F) TEM micrographs showing negatively stained  
915 EV. In some cases, EV appear to coalesce and fuse (F).

916

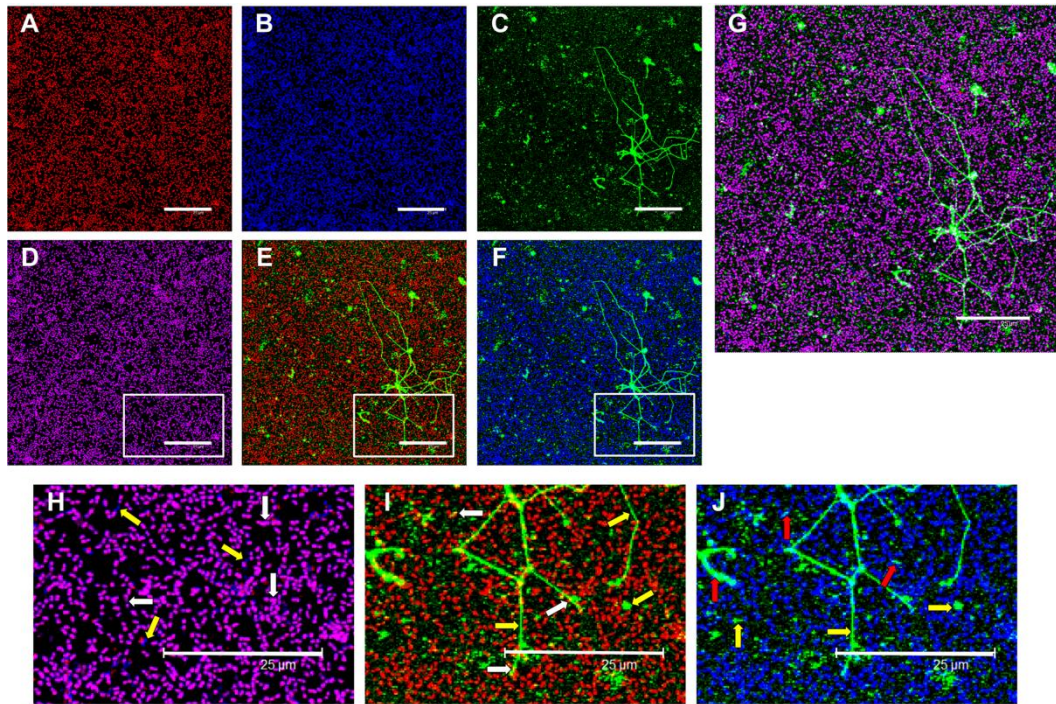

**FIG 1** Evidence of the existence of eDNA in pneumococcal biofilms using CLSM. A biofilm of *S. pneumoniae* R6 grown for 5 h at 34°C in C+Y medium was stained with a combination of SYTO 59 (A, red), DDAO (B, blue), and  $\alpha$ -dsDNA, followed by Alexa Fluor-488 goat anti-mouse IgG (C, green). Image D is a merge of channels A and B. Image E is a merge of channels A and C. Image F is a merge of channels B and C. Image G is a merge of the three channels. Images H, I and J correspond, respectively, to an enlarged vision of the area marked with squares in D, E and F. Yellow arrows point to eDNA stained only with DDAO or  $\alpha$ -dsDNA–Alexa Fluor-488. White arrows indicate the location of SYTO 59-stained bacteria together with eDNA labelled either with DDAO (H, magenta) or with  $\alpha$ -dsDNA–Alexa Fluor-488 (I, yellow). The red arrow in image J points to doubly labelled (DDAO plus  $\alpha$ -dsDNA–Alexa Fluor-488) eDNA (J, light blue). Scale bars = 25  $\mu$ m.

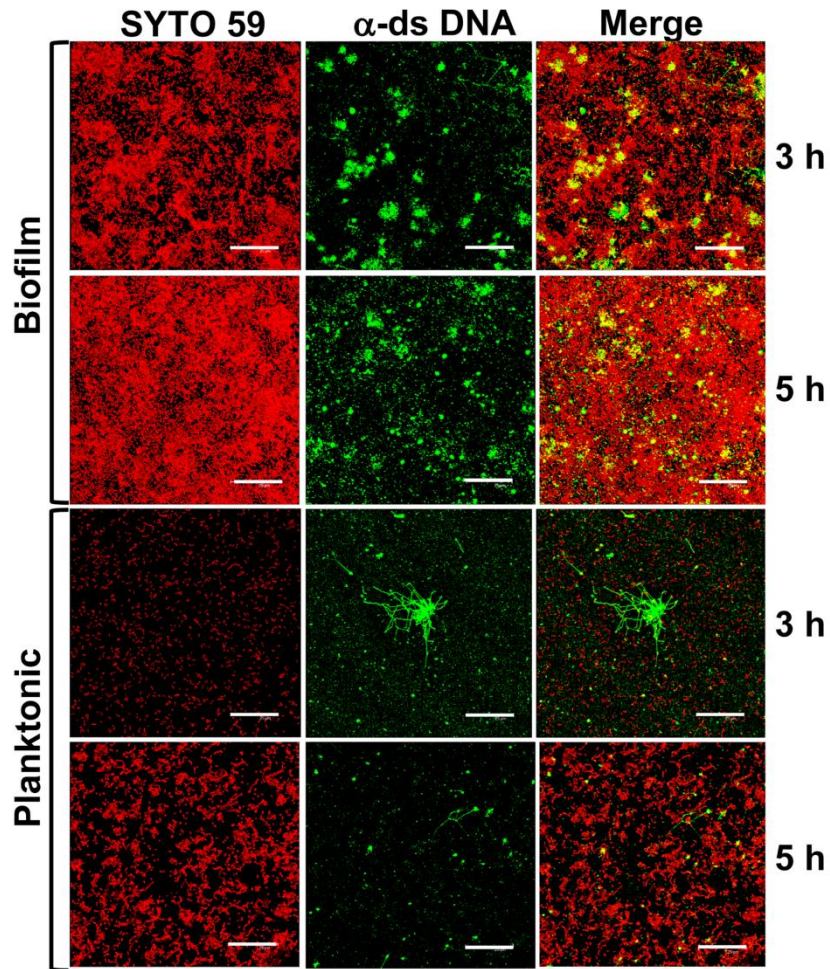

**FIG 2** Dynamics of eDNA release in pneumococcal biofilms. *S. pneumoniae* R6 was grown under biofilm-forming conditions. After 3 and 5 h incubation at 34°C, adherent (biofilm) and non-adherent (planktonic) cells were independently stained with a combination of SYTO 59 (red) and  $\alpha$ -dsDNA–Alexa Fluor-488 (green). Scale bars = 25  $\mu$ m.

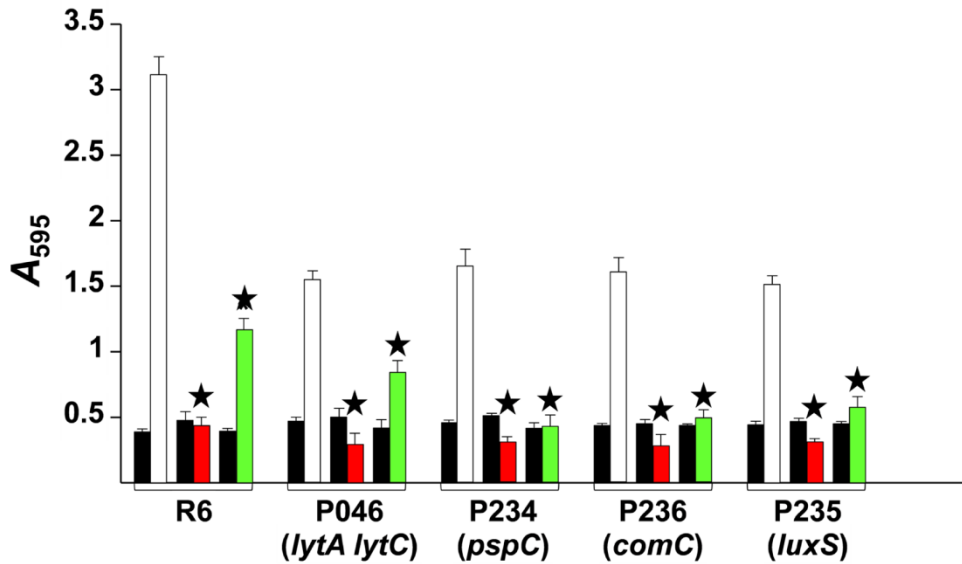

**FIG 3** Inhibition and dispersal of pneumococcal biofilms with DNase I. The indicated *S. pneumoniae* strains were grown overnight at 37°C to an  $A_{550}$  value of 0.5 (corresponding to the late exponential phase of growth) in C+Y medium, centrifuged, and adjusted to an  $A_{550}$  of 0.6 with fresh medium. The cell suspensions were then diluted 100-fold, and 200  $\mu$ l aliquots distributed into the wells of microtiter plates, which were then incubated for 5 h at 34°C (open bars). Other samples received DNase I (100  $\mu$ g ml<sup>-1</sup>) (red bars) and were incubated as above (inhibition assay). In other cases, and after biofilm development (4 h at 34°C), DNase I (green bars) was added at 100  $\mu$ g ml<sup>-1</sup>, and incubation allowed to proceed for an additional 1 h at 34°C before staining with CV to quantify biofilm formation (dispersal assay). In all assays, black bars indicate growth (adherent plus non-adherent cells). \*,  $P < 0.001$  compared with the corresponding, untreated control.



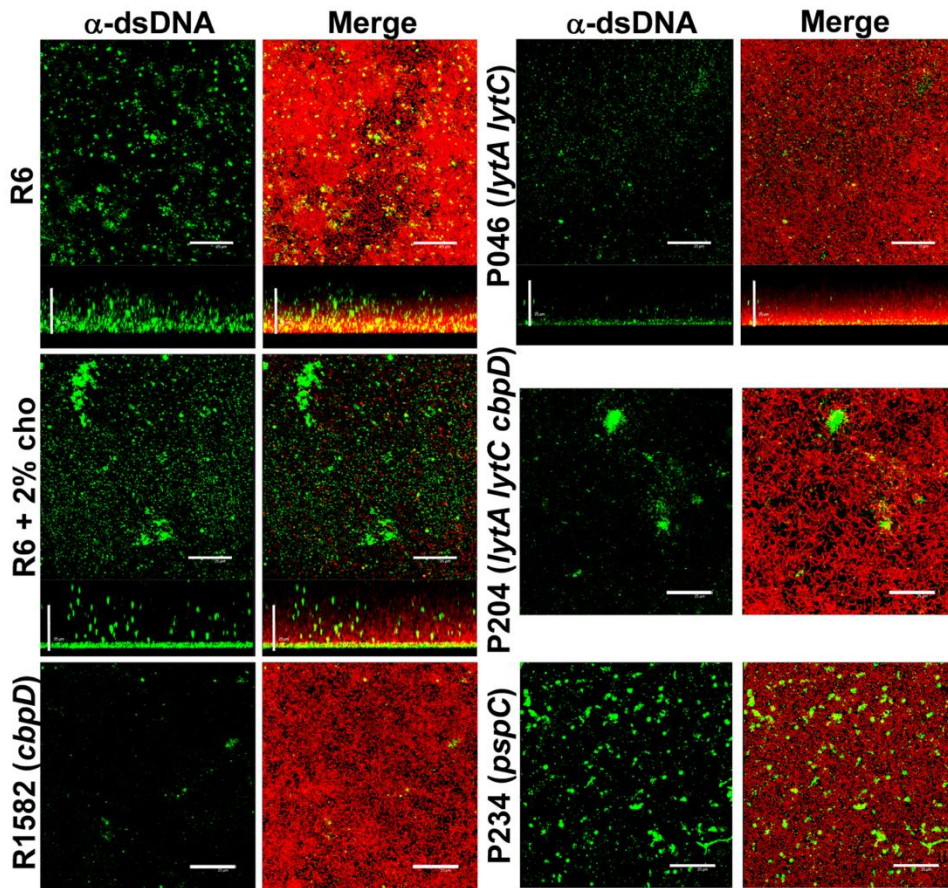

**FIG 4** Influence of autolysins on biofilm formation and eDNA release revealed by CLSM. Biofilms were stained with a combination of SYTO 59 (red), and  $\alpha$ -dsDNA, followed by Alexa Fluor-488 goat anti-mouse IgG (green). The R6 strain was also incubated in C+Y medium containing 2% choline chloride (R6 + 2% cho). Horizontal and vertical three-dimensional reconstructions of 55 ( $x$ - $y$  plane) or 65 scans ( $x$ - $z$  plane) are shown. Scale bars = 25  $\mu$ m.

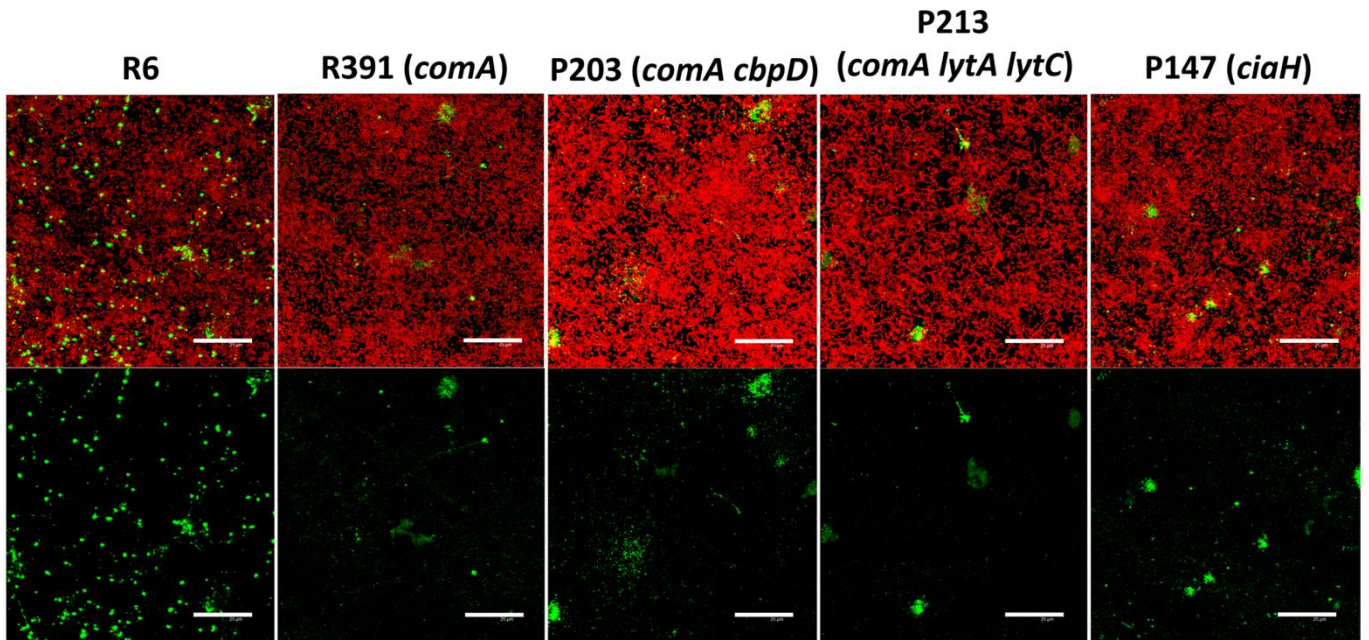

**FIG 5** Influence of competence induction on biofilm formation and eDNA release revealed by CLSM. Biofilms were stained with a combination of SYTO 59 (red), and  $\alpha$ -dsDNA, followed by Alexa Fluor-488 goat anti-mouse IgG (green). Scale bars = 25  $\mu$ m.
